# Supplementary material for: One-step conversion of tannic acid-modified ZIF-67 into oxygen defect hollow Co3O4/nitrogen-doped carbon for efficient electrocatalytic oxygen evolution
Source: Royal Society of Chemistry journal article supplement (doi:10.1039/d0ra07696a), 2020-01-01
Supplement: d0ra07696a1.pdf [file d0ra07696a1.pdf]

**One-step conversion of tannic acid-modified ZIF-67 into oxygen defects hollow  
Co<sub>3</sub>O<sub>4</sub>/nitrogen-doped carbon for efficient electrocatalytic oxygen evolution**

Changshui Wang<sup>1</sup>, Jiahui Zhang<sup>1</sup>, Zenong Zhang, Guancheng Ren, Dandan Cai\*

*Guangxi Key Laboratory of Low Carbon Energy Materials, School of Chemistry and  
Pharmaceutical Sciences, Guangxi Normal University, Guilin, 541004, P. R. China*

**Table of Content**

|                  |                                                                                                                                                                                                                                         |
|------------------|-----------------------------------------------------------------------------------------------------------------------------------------------------------------------------------------------------------------------------------------|
| <b>Figure S1</b> | FTIR spectra of TAMZIF-67, ZIF-67, and TA.                                                                                                                                                                                              |
| <b>Figure S2</b> | TG analysis of O <sub>V</sub> -HCo <sub>3</sub> O <sub>4</sub> @NC under air.                                                                                                                                                           |
| <b>Figure S3</b> | Raman spectrum of O <sub>V</sub> -HCo <sub>3</sub> O <sub>4</sub> @NC.                                                                                                                                                                  |
| <b>Figure S4</b> | (a) N <sub>2</sub> adsorption-desorption isotherms and (b) the pore size distribution of O <sub>V</sub> -HCo <sub>3</sub> O <sub>4</sub> @NC.                                                                                           |
| <b>Figure S5</b> | (a) FESEM image of ZIF-67, (b) FESEM image of TAMZIF-67, (c) TEM image of TAMZIF-67, and (d) FESEM of A-ZIF-67.                                                                                                                         |
| <b>Figure S6</b> | EPR spectrum of O <sub>V</sub> -HCo <sub>3</sub> O <sub>4</sub> @NC.                                                                                                                                                                    |
| <b>Figure S7</b> | (a) The double-layer capacitance (C <sub>dl</sub> ) is equivalent to half the slope. Cyclic voltammograms of (b) O <sub>V</sub> -HCo <sub>3</sub> O <sub>4</sub> @NC and (c) A-ZIF-67 in the double layer region at various scan rates. |
| <b>Figure S8</b> | (a) TEM image and (b) XRD pattern of O <sub>V</sub> -HCo <sub>3</sub> O <sub>4</sub> @NC after OER stability test.                                                                                                                      |

---

\*Corresponding author

E-mail: [caidandan86@163.com](mailto:caidandan86@163.com)

C. Wang and J. Zhang contributed equally to this work.

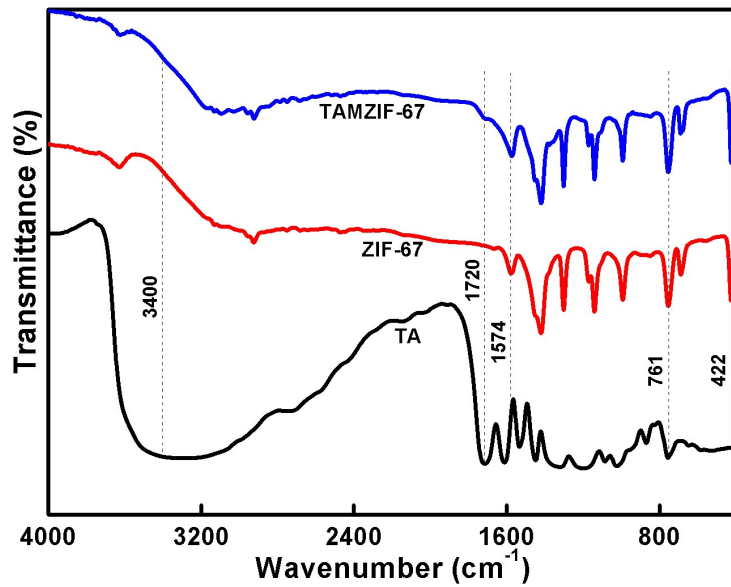

Figure S1 FTIR spectra of TAMZIF-67, ZIF-67, and TA.

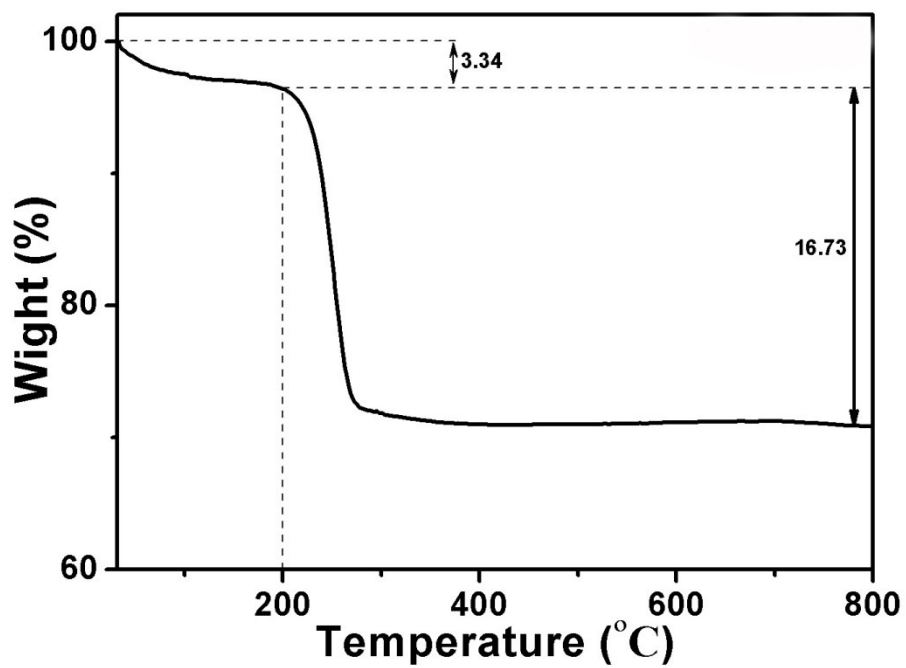

Figure S2 TG analysis of  $O_v\text{-HCO}_3O_4@NC$  under air.

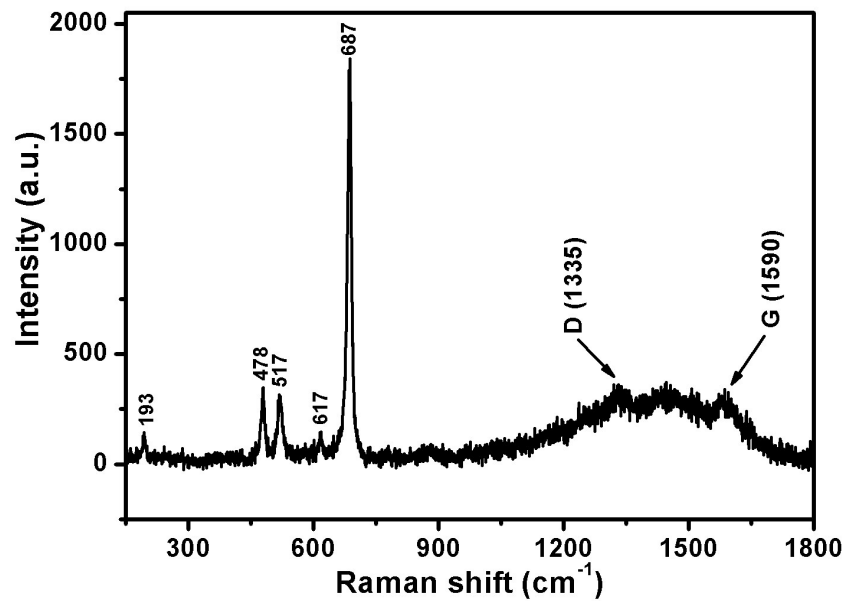

Figure S3 Raman spectrum of  $O_V\text{-HCO}_3\text{O}_4\text{@NC}$ .

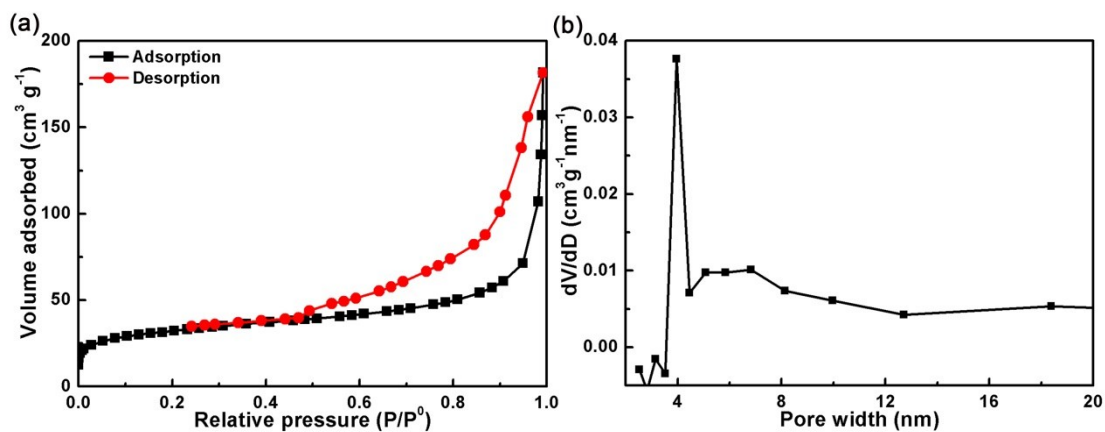

Figure S4 (a)  $N_2$  adsorption-desorption isotherms and (b) the pore size distribution of  $O_V\text{-HCO}_3\text{O}_4\text{@NC}$ .

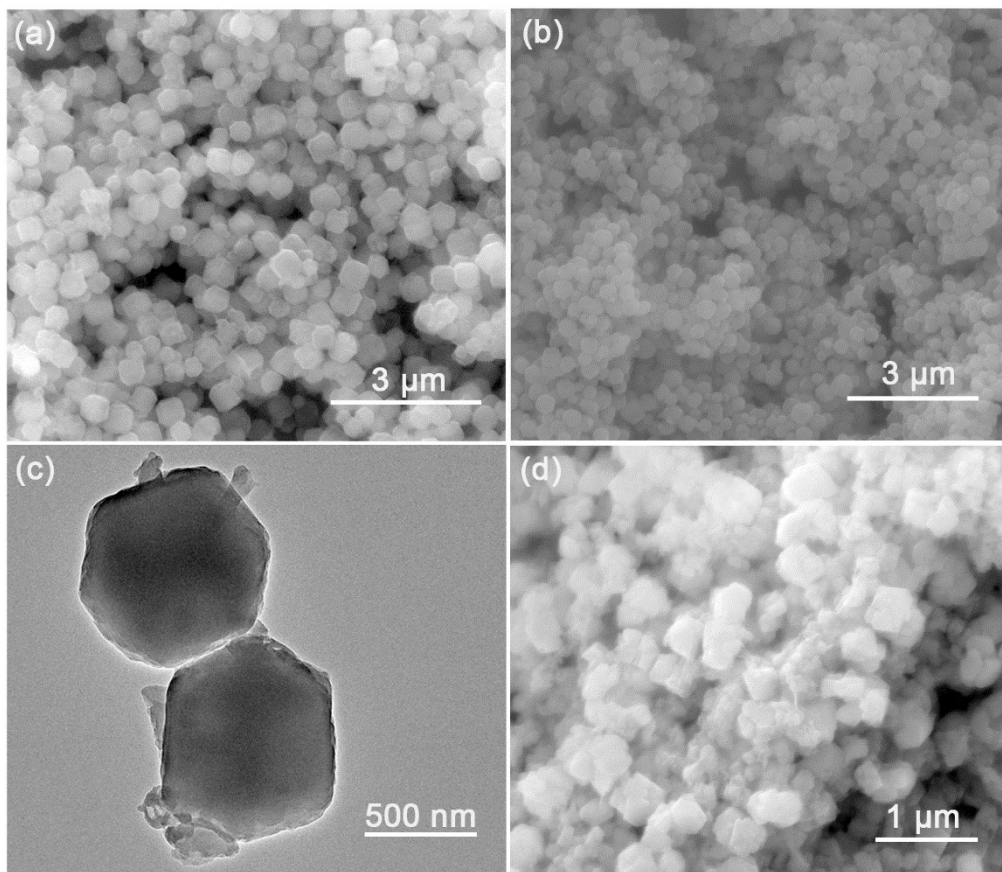

**Figure S5** (a) FESEM image of ZIF-67, (b) FESEM image of TAMZIF-67, (c) TEM image of TAMZIF-67, and (d) FESEM of A-ZIF-67.

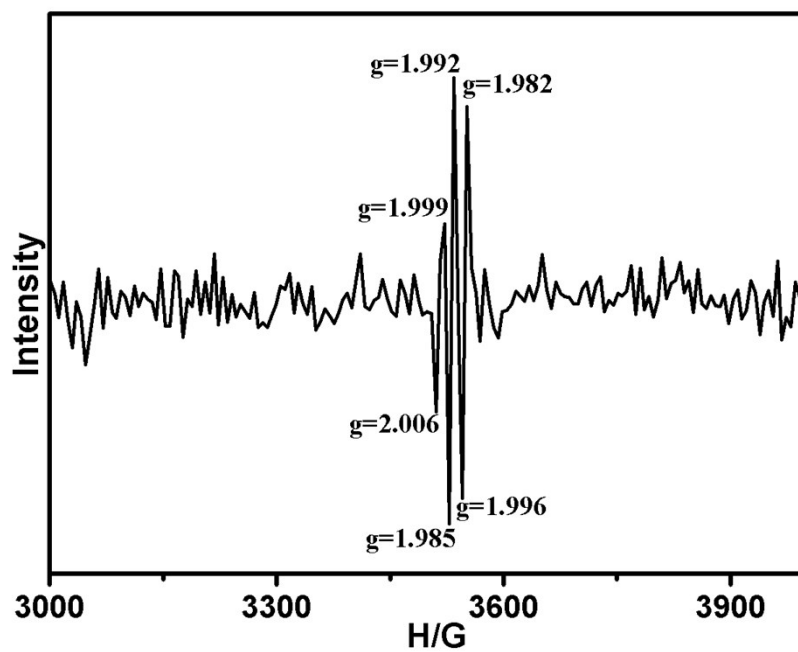

**Figure S6** EPR spectrum of  $O_v\text{-HCo}_3\text{O}_4@\text{NC}$ .

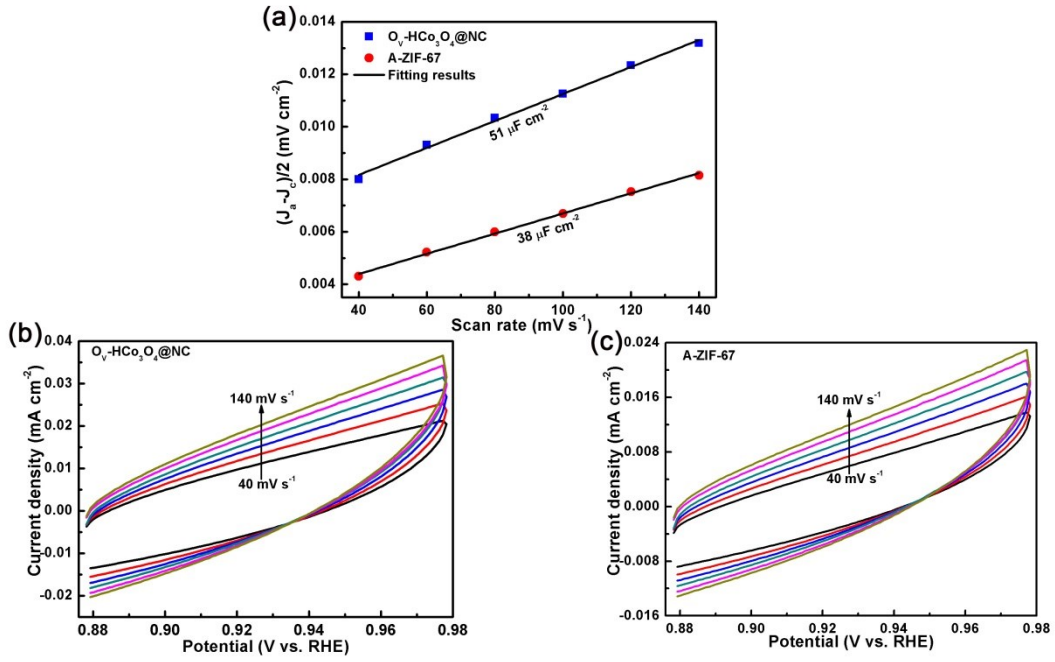

**Figure S7** (a) The double-layer capacitance ( $C_{dl}$ ) is equivalent to half the slope. Cyclic voltammograms of (b) O<sub>V</sub>-HCo<sub>3</sub>O<sub>4</sub>@NC and (c) A-ZIF-67 in the double layer region at various scan rates.

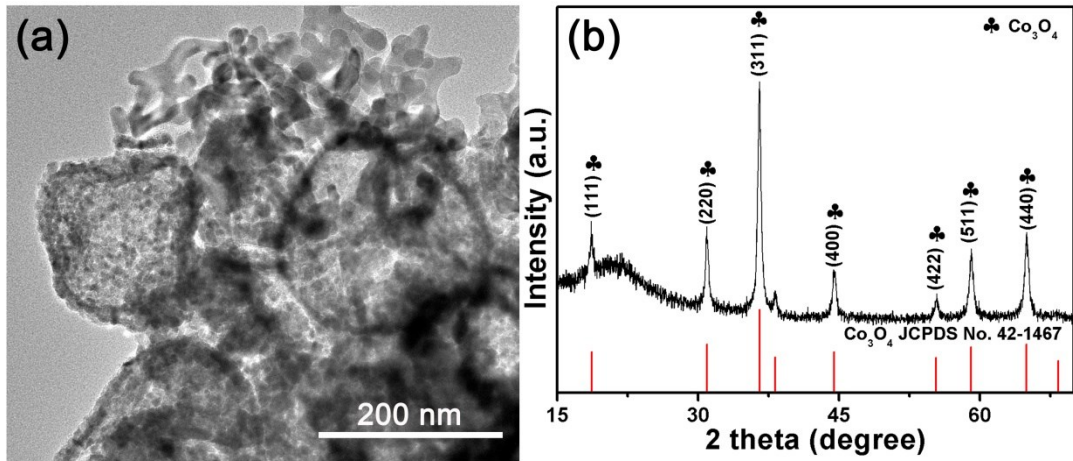

**Figure S8** (a) TEM image and (b) XRD pattern of O<sub>V</sub>-HCo<sub>3</sub>O<sub>4</sub>@NC after OER stability test.
